# Supplementary material for: Characterization and Mapping of a Rolling Leaf Mutant Allele rlT73 on Chromosome 1BL of Wheat
Source: MDPI journal article supplement (doi:10.3390/ijms25074103), 2024-04-07
Supplement: s1 [file s1]

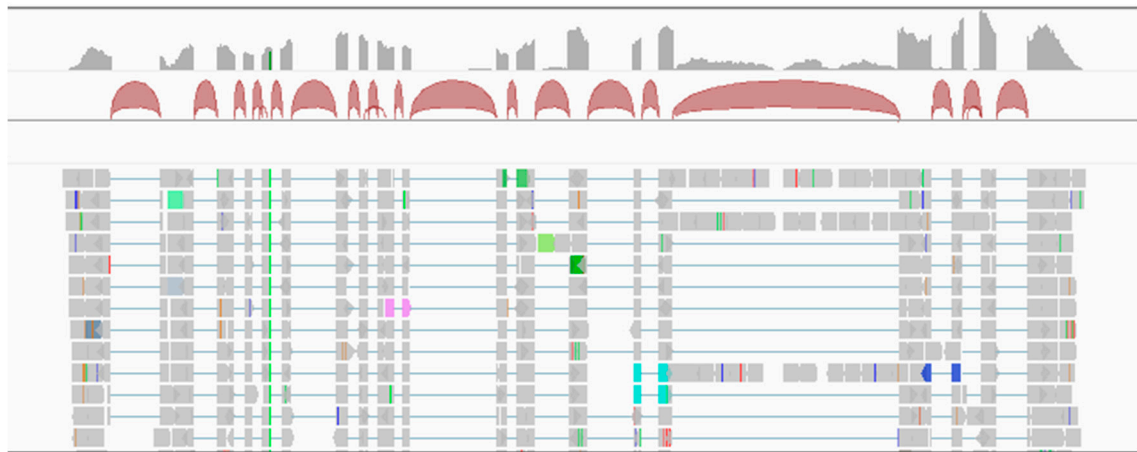

Figure S1 Mutation sites in *TraesCS1B03G0515400* visualised in Integrated Genomics Viewer (IGV). Consistent point mutation in *HB-B2* is marked in green.
