# Supplementary material for: Characterization and Mapping of a Rolling Leaf Mutant Allele rlT73 on Chromosome 1BL of Wheat
Source: Int J Mol Sci. 2024 Apr 7;25(7):4103. doi: 10.3390/ijms25074103 (PMC11012251; doi:10.3390/ijms25074103)
Supplement: Supplementary file 1 [file ijms-25-04103-s001.zip › Table S1-2.xlsx]

## Sheet: Table S1
Table S1 List of annotated genes in the rlT73 interval.
Chromosome	Start	End	Strand	Chinese Spring v2.1 Gene ID	Previous_id	Annotation
chr1B	301330822	301370753	+	TraesCS1B03G0490100	TraesCS1B02G166800	WD-repeat cell cycle regulatory protein
chr1B	302874816	302887305	+	TraesCS1B03G0492700	TraesCS1B02G167000	Peroxisome biogenesis protein 12
chr1B	302890100	302893685	+	TraesCS1B03G0493200	TraesCS1B02G167100	Eukaryotic translation initiation factor 4E
chr1B	302894831	302899181	+	TraesCS1B03G0493300	TraesCS1B02G167200	Cellulose synthase
chr1B	302902168	302908808	+	TraesCS1B03G0493400	TraesCS1B02G167300	Acetyl-coenzyme A carboxylase carboxyl transferase subunit beta
chr1B	303048721	303052289	-	TraesCS1B03G0493600	TraesCS1B02G167400	Receptor protein kinase
chr1B	303141936	303150941	+	TraesCS1B03G0493700	TraesCS1B02G167500	Receptor protein kinase
chr1B	303203357	303204831	-	TraesCS1B03G0493900	TraesCS1B02G167600	Methyl esterase 1
chr1B	303449061	303454000	+	TraesCS1B03G0494000	TraesCS1B02G167700	Receptor protein kinase
chr1B	303484433	303491519	+	TraesCS1B03G0494100	TraesCS1B02G167800	Esterase/lipase/thioesterase-like protein
chr1B	303492238	303494076	-	TraesCS1B03G0494300	TraesCS1B02G167900	Homeobox prospero
chr1B	303686381	303692461	+	TraesCS1B03G0494500	TraesCS1B02G168000	Peptide transporter
chr1B	303845246	303849635	+	TraesCS1B03G0494600	TraesCS1B02G168100	Peptide transporter
chr1B	304111665	304116734	+	TraesCS1B03G0494800	TraesCS1B02G168200	RNA-binding protein-like
chr1B	304119202	304122840	+	TraesCS1B03G0495000	TraesCS1B02G168300	Mammalian uncoordinated homology 13
chr1B	304458216	304474386	-	TraesCS1B03G0495300	TraesCS1B02G168400	Fatty acid hydroxylase superfamily
chr1B	304543459	304551651	-	TraesCS1B03G0495700	TraesCS1B02G168500	Fatty acid hydroxylase superfamily
chr1B	305815001	305817531	+	TraesCS1B03G0496900	TraesCS1B02G168600	Cyanate hydratase
chr1B	305818373	305835572	-	TraesCS1B03G0497000	TraesCS1B02G168700	ATP-dependent RNA helicase
chr1B	306030073	306034918	-	TraesCS1B03G0497300	TraesCS1B02G168800	Tetratricopeptide repeat protein 7A
chr1B	306347439	306350458	-	TraesCS1B03G0497800	TraesCS1B02G168900	Cyclin dependent kinase inhibitor
chr1B	306687581	306688012	+	TraesCS1B03G0498100	TraesCS1B02G169000	Iron sulfur cluster assembly protein 1
chr1B	306698286	306699823	+	TraesCS1B03G0498600	TraesCS1B02G169100	Tyrosyl-tRNA synthetase
chr1B	306701004	306704035	+	TraesCS1B03G0498700	TraesCS1B02G169200	PPPDE thiol peptidase family protein
chr1B	306704476	306704820	-	TraesCS1B03G0498800	TraesCS1B02G169300	Embryo sac development arrest 6
chr1B	306938390	306944080	+	TraesCS1B03G0499000	TraesCS1B02G169400	WD repeat protein
chr1B	307085825	307089153	+	TraesCS1B03G0499200	TraesCS1B02G169500	3-ketoacyl-CoA synthase
chr1B	307313417	307322577	-	TraesCS1B03G0499300	TraesCS1B02G169600	Non-lysosomal glucosylceramidase
chr1B	307612686	307615594	+	TraesCS1B03G0500400	TraesCS1B02G169700	NBS-LRR disease resistance protein
chr1B	307615979	307619651	-	TraesCS1B03G0500600	TraesCS1B02G169800	NB-ARC domain containing protein
chr1B	307619453	307620789	+	TraesCS1B03G0500650	TraesCS1B02G169800	NB-ARC domain containing protein
chr1B	307620774	307648640	-	TraesCS1B03G0500700	TraesCS1B02G169900	UDP-glucose:Glycoprotein Glucosyltransferase
chr1B	307923811	307924996	-	TraesCS1B03G0501100	TraesCS1B02G170000	Sentrin-specific protease
chr1B	308151055	308152607	+	TraesCS1B03G0501600	TraesCS1B02G170100	Ribonuclease
chr1B	308386915	308390753	+	TraesCS1B03G0501800	TraesCS1B02G170200	Ribonuclease
chr1B	308557709	308564521	+	TraesCS1B03G0501900	TraesCS1B02G170300	Phosphoribosylformylglycinamidine synthase family protein
chr1B	308853233	308855986	+	TraesCS1B03G0502500	TraesCS1B02G170400	Pentatricopeptide repeat-containing protein
chr1B	308857098	308865333	-	TraesCS1B03G0502600	TraesCS1B02G170500	Protein kinase superfamily protein
chr1B	309104470	309109825	-	TraesCS1B03G0502700	TraesCS1B02G170600	S-adenosyl-L-methionine-dependent methyltransferases superfamily protein
chr1B	309116094	309116883	-	TraesCS1B03G0502900	TraesCS1B02G170800	Calpain-type cysteine protease family
chr1B	309127855	309136727	-	TraesCS1B03G0503200	TraesCS1B02G170900	Exportin-4
chr1B	309568238	309570037	+	TraesCS1B03G0503600	TraesCS1B02G171000	Pentatricopeptide repeat-containing protein
chr1B	310014973	310022754	-	TraesCS1B03G0504700	TraesCS1B02G171100	F-box protein
chr1B	310720702	310723638	+	TraesCS1B03G0505600	TraesCS1B02G171194	Pentatricopeptide repeat-containing protein
chr1B	310848519	310857997	-	TraesCS1B03G0505700	TraesCS1B02G171200	Serine/threonine-protein phosphatase 2A regulatory subunit B'' subunit alpha
chr1B	311121028	311122950	+	TraesCS1B03G0505800	TraesCS1B02G171300	Autophagy 2
chr1B	311488606	311492181	+	TraesCS1B03G0505900	TraesCS1B02G171400	Vacuolar protein sorting-associated protein 2-like protein 2
chr1B	311504776	311509190	-	TraesCS1B03G0506000	TraesCS1B02G171500	Kinase family protein
chr1B	311509607	311513474	-	TraesCS1B03G0506100	TraesCS1B02G171600	Adaptin ear-binding coat-associated protein
chr1B	311603977	311606882	-	TraesCS1B03G0506400	TraesCS1B02G171700	Polyubiquitin
chr1B	311872292	311879230	+	TraesCS1B03G0506800	TraesCS1B02G171800	Long-chain-alcohol oxidase
chr1B	312401379	312415532	-	TraesCS1B03G0507000	TraesCS1B02G171900	Transportin-3
chr1B	312546575	312549788	+	TraesCS1B03G0507200	TraesCS1B02G172000	E3 ubiquitin-protein ligase SINA-like 10
chr1B	313325716	313326854	-	TraesCS1B03G0507900	TraesCS1B02G172100	Light-dependent short hypocotyls-LIKE protein (DUF640)
chr1B	313498675	313500185	+	TraesCS1B03G0508500	TraesCS1B02G172200	F-box protein
chr1B	313706563	313712418	-	TraesCS1B03G0508900	TraesCS1B02G172300	HCO3- transporter family
chr1B	313750307	313753475	+	TraesCS1B03G0509100	TraesCS1B02G172400	Malate dehydrogenase
chr1B	313805560	313807322	-	TraesCS1B03G0509200	TraesCS1B02G172500	MYB protein
chr1B	314262839	314263387	+	TraesCS1B03G0509300	TraesCS1B02G172600	DNA topoisomerase
chr1B	314331986	314334451	+	TraesCS1B03G0509400	TraesCS1B02G172700	QWRF motif protein (DUF566)
chr1B	314701197	314702982	-	TraesCS1B03G0510900	TraesCS1B02G172800	Transmembrane protein
chr1B	314900665	314900781	+	TraesCS1B03G0511300	TraesCS1B02G173000	Transmembrane protein
chr1B	315220668	315223746	+	TraesCS1B03G0512000	TraesCS1B02G173100	Pentatricopeptide repeat-containing protein
chr1B	315481724	315485161	+	TraesCS1B03G0512300	TraesCS1B02G173200	Cytokinin riboside 5'-monophosphate phosphoribohydrolase
chr1B	315692341	315703264	+	TraesCS1B03G0512400	TraesCS1B02G173300	Mitochondrial import inner membrane translocase subunit tim16
chr1B	315801636	315806377	+	TraesCS1B03G0512500	TraesCS1B02G173400	Transporter-related family protein
chr1B	316499417	316502262	-	TraesCS1B03G0513400	TraesCS1B02G173500	Protein detoxification
chr1B	316667629	316677876	+	TraesCS1B03G0513500	TraesCS1B02G173600	Pleckstrin-like (PH) and lipid-binding START domain protein
chr1B	317234191	317239126	+	TraesCS1B03G0514800	TraesCS1B02G173700	Auxin response factor
chr1B	317441605	317441892	-	TraesCS1B03G0515200	TraesCS1B02G173800	B3 domain-containing protein family
chr1B	317723839	317733916	+	TraesCS1B03G0515400	TraesCS1B02G173900	Homeobox leucine-zipper protein
chr1B	317983939	317989889	-	TraesCS1B03G0515500	TraesCS1B02G174000	Double stranded RNA binding protein 3

## Sheet: Table S2
Table S2 List of primers used in this study.
Primer name		Sequences 5'-3'	Marker type	Function	Reference
kasp-21	Forward1	GAAGGTCGGAGTCAACGGATTagttcccttggtatgctcctT	KASP	Mapping	In this study
	Forward2	GAAGGTGACCAAGTTCATGCTagttcccttggtatgctcctC
	Common	ggaagttgtacgcaaacggg
kasp-25	Forward1	GAAGGTGACCAAGTTCATGCTtggaagcaaaggaatgatcgT	KASP	Mapping	In this study
	Forward2	GAAGGTCGGAGTCAACGGATTtggaagcaaaggaatgatcgC
	Common	gacgttggtggagtcatcga
kasp-45	Forward1	GAAGGTCGGAGTCAACGGATTtcttgcactttggtagcttcC	KASP	Mapping	In this study
	Forward2	GAAGGTGACCAAGTTCATGCTtcttgcactttggtagcttcT
	Common	aatctgtcgatgccgagctg
M306	Forward	GAGGAGAGGACTAACTAGGC	InDel	Mapping	In this study
	Reverse	CTCGGTGGAAATCATGCG
M308	Forward	TGACGAGGGTGATGATACGG	Sequencing	Mapping	In this study
	Reverse	CCGGTTTTCCTTACAAACTGG
M318	Forward	TCATTCTACTGTCAGTTAGGT	InDel	Mapping	In this study
	Reverse	GACTCCAAGGAGATGAAATG
kasp-19	Forward1	GAAGGTCGGAGTCAACGGATTgagccgactttgttgatgacaG	KASP	Mapping	In this study
	Forward2	GAAGGTGACCAAGTTCATGCTgagccgactttgttgatgacaA
	Common	accctgaccctgatagcaag
kasp-18	Forward1	GAAGGTGACCAAGTTCATGCTcGttggttgaCaTggttgaGaA	KASP	Mapping	In this study
	Forward2	GAAGGTCGGAGTCAACGGATTcGttggttgaCaTggttgaGaG
	Common	actgaagcctagaaccctgA
kasp-15	Forward1	GAAGGTCGGAGTCAACGGATTagcccaaccgtcagataaaaaT	KASP	Mapping	In this study
	Forward2	GAAGGTGACCAAGTTCATGCTagcccaaccgtcagataaaaaC
	Common	cgcacactgtttcgatccac
kasp-13	Forward1	GAAGGTGACCAAGTTCATGCTacttcagcgcatattgcacA	KASP	Mapping	In this study
	Forward2	GAAGGTCGGAGTCAACGGATTacttcagcgcatattgcacG
	Common	tggctttgctcttactccgt
HB-A2	Forward	GGACATGAAAACAGATGGTGCA		Expression	[21]
	Reverse	AATTGTCAGCACTGATCGTAGG
HB-B2	Forward	CTGCTCCCAATGCTTTTATTGT		Expression	[21]
	Reverse	GTGGAACACTCTGCAGTAACA
HB-D2	Forward	GATCTGGCTTGAATGCTGAACAT		Expression	[21]
	Reverse	CCCAGATGGAACCGGTAACTTT
